# Supplementary material for: Genetic assimilation of ancestral plasticity during parallel adaptation to zinc contamination in Silene uniflora
Source: PubMed Central journal article supplement (PMC9998271; doi:10.1038/s41559-022-01975-w), 2023-01-26
Supplement: 41559_2022_1975_MOESM1_ESM.pdf [file 41559_2022_1975_MOESM1_ESM.pdf]

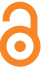

# Genetic assimilation of ancestral plasticity during parallel adaptation to zinc contamination in *Silene uniflora*

In the format provided by the authors and unedited

1  
2  
3  
4  
5  
6  
7  
8  
9  
10  
11  
12  
13  
14  
15

**This PDF file includes:**

- Supplementary Methods
- Legends for Supplementary Files 1-7
- Supplementary Tables 1-5
- Supplementary References

**Other supplementary materials for this manuscript include the following:**

- Supplementary Files 1-8

## 16 **Supplementary Methods**

17

18

### 19 **1. Plant materials and experimental procedure**

20 Seeds from each of the four populations were collected as described in Papadopoulos *et al.*<sup>1</sup>.

21 Populations T1, S1, T2 and S2 correspond to populations WWA-M, WWA-C, ENG-M and

22 ENG-C in Papadopoulos *et al.*<sup>1</sup>. In October 2019 wild-collected seeds (three seeds per

23 population, collected from different individuals) were germinated in Erin Traditional

24 Multipurpose Compost in 80ml cells and grown in a greenhouse (16/8 hour day/night cycle;

25 temperature controlled 18/12 °C, supplementary lighting automatically switched on if light

26 levels fell below 120  $\mu\text{mol m}^{-2} \text{s}^{-1}$  during the day) before being transplanted to 1.5L pots

27 filled with compost and 14.7g MiracleGro Slow Release Fertiliser after five weeks. When

28 the plants were ten weeks old at least six 6-8cm cuttings per plant were taken per plant and

29 suspended in a foam discs (1 disc per individual) in a 40 Site X-Stream Aeroponic

30 Propagator filled with 12L Ultrapure deionised water (Barnstead D4642-33 e-pure ultra

31 water purification system). After 2.5 weeks the propagator was refreshed with 1.92g

32 Hoaglands No. 2 Basalt Salt Solution (Merck) dissolved in 12L ultrapure water once a

33 week for a further three weeks to encourage root growth. This second round of root

34 development, after being grown from seed in common benign conditions, should reduce

35 any maternal effects from differences in resource allocation to seeds between populations.

36 The rooted cuttings were then transferred to six hydroponics tanks. For each tank,

37 1.28g Hoaglands No. 2 Basal Salt Solution was dissolved in 0.8L deionised water (Fluid

38 Science) and adjusted to pH 5.5 using 0.1M Potassium Hydroxide. This was added to an

39 18L opaque tank (48 x 39 x 20cm) and topped up to 8L using deionised water. Tanks were

40 aerated using an airstone and pump. Individual cuttings in foam discs were added to 5x4

41 polystyrene floats, with 18-19 cuttings per tank, with cuttings from each individual present  
42 at least once in each tank and approximately equal representation of each population in  
43 each tank.

44 After one week of acclimation, the hydroponic solution was replaced. For three of  
45 the six tanks, fresh hydroponics solution prepared as previously described was added  
46 (control treatment). For the remaining three tanks, 1.28g of Hoaglands No2 Basal Salt  
47 solution and 2.4mL 2.0M ZnSO<sub>4</sub> solution (Sigma) were dissolved in 0.798 ml deionised  
48 water, and adjusted to pH 5.5 as above. This was then topped up to 8L with deionised  
49 water, giving a final ZnSO<sub>4</sub> concentration of 600µM (zinc treatment). Eight days after  
50 media replacement, the roots from each individual cutting were flash frozen in liquid  
51 nitrogen and stored on dry ice before being transferred to a -80°C freezer. From each  
52 individual within a treatment, one cutting's roots from each of the three tanks (which were  
53 of approximately equal size) were pooled. This resulted in each of the three individuals per  
54 population being represented by a pooled sample of three cuttings (one from each of the  
55 three replicate tanks), for both the control and the zinc treatment. This approach reduced  
56 technical variation from between-cutting and between-tank differences, and allowed  
57 between-individual variation to be accounted for when comparing within populations  
58 between the two treatments.

59

## 60 **2. RNA extraction and sequencing**

61 Roots from each sample were homogenised on dry ice using a pestle to evenly distribute  
62 material from each of the three replicate cuttings. From this, a volume of approximately  
63 150µL of material was added to 2.0mL Safe-Lock Tube (Eppendorf) along with a 5mm

64 stainless steel bead (Qiagen). Samples were homogenised using a TissueLyser LT (Qiagen),  
65 the adapter of which had been chilled in a -80°C freezer for at least 2 hours, for 1 minute  
66 at 50Hz. RNA was extracted using a Qiagen RNeasy Plant Mini Kit (Qiagen) using the  
67 standard protocol, including the optional DNase digestion step, with two 50µL elutions in  
68 RNase free water. RNA quantity and quality were checked using electrophoresis on a 1%  
69 agarose gel, a Nanodrop v2 and Qubit BR RNA Assay Kit (Thermo Fisher) using a Qubit  
70 v3. Samples were shipped on dry ice to the Beijing Genomics Institute in Hong Kong and  
71 RNA integrity measured using an Aligent Technologies 2100 Bioanalyser, with RIN  
72 ranging from 8.2-10.0 (Supplementary File 7). RNA-seq libraries were prepared according  
73 to the BGISEQ-500 RNA-Seq Library Preparation Protocol (Document NO: SOP-SS-027)  
74 with mRNA enrichment using oligo(dT)-attached magnetic beads. Libraries were  
75 sequenced on a BGISEQ500 with 100bp paired-end reads with an average insert size of  
76 161bp. This produced 25.1-26.0M read pairs per sample (Supplementary File 7).

77

### 78 **3. Data pre-processing, transcriptome assembly and transcript quantification.**

79 Read quality was inspected using FastQC<sup>2</sup> v0.11.8. The IlluQC.pl script from  
80 NGSQCToolkit<sup>3</sup> v2.3.3 was used to keep reads with at least 70% of the sequence having  
81 a PHRED score >20. Trimmomatic<sup>4</sup> v0.39 was used with settings LEADING:10  
82 TRAILING:10 SLIDINGWINDOW:4:15 MINLEN:70 to remove leading and trailing low-  
83 quality bases with a length cut-off of 70bp. Trimmed reads were inspected for quality and  
84 adapter contamination using FastQC.

85 *De novo* transcriptome assembly was performed using Trinity<sup>5</sup> v2.10.0 using -  
86 min\_kmer\_cov=2 and default settings for all other parameters. The reads from control and

87 zinc from the individual in each population with the highest total number of reads were  
88 used to construct the transcriptome (Supplementary File 7). This resulted in a transcriptome  
89 of 502,579 transcripts from 270,649 trinity “genes” (henceforth referred to as genes).  
90 Transdecoder<sup>5</sup> v.5.5.0 was used to predict open reading frames (ORFs) and transcripts  
91 lacking an ORF at least 100 amino acids long, which are likely to mostly be assembly  
92 artefacts, were discarded. 237,424 transcripts from 121,009 genes were retained. Reads  
93 were mapped to these transcripts using the align\_and\_estimate\_abundance.pl utility in  
94 Trinity, using kallisto<sup>6</sup> v0.46.1.

95 To examine whether short-read transcriptome assembly may present difficulties in  
96 accurately reconstructing transcripts, we calculated Ex90N50 using the trinity  
97 contig\_ExN50\_statistic.pl utility, giving a value of 2,316bp. This indicates that the N50 of  
98 the most highly expressed 90% of the transcriptome is 2,316. An iso-seq transcriptome,  
99 which uses longer PacBio reads for de novo assembly, was recently published from *Silene*  
100 *noctiflora*<sup>7</sup>. This had an N50 value of 1,857, suggesting our transcriptome assembly is of  
101 comparable contiguity to one constructed using long-read sequencing technology.  
102 Transcriptome completeness was assessed using BUSCO<sup>8</sup> v.4.0.5 using the Eudicot  
103 dataset. For these highly conserved single copy genes our transcriptome assembly is 72.2%  
104 single copy, 2.8% duplicated, 8.4% fragmented and 16.6% missing. This is a level of  
105 completeness comparable to the *S. uniflora* genome assembly<sup>1</sup>, indicating a low percentage  
106 of BUSCO transcripts being inappropriately fragmented or deleted. These results indicate  
107 little inappropriate fragmentation or duplication of genes in our assembly.

108 Individual de novo assemblies may reduce the chances of genetically divergent  
109 homologous transcripts being resolved into separate genes, but reducing the amount of data

110 per assembly may also reduce the number of transcripts that can be assembled. To evaluate  
111 the impact of multiple vs individual assemblies, the individuals used in the joint  
112 transcriptome assembly were assembled individually and completeness/duplication  
113 assessed using BUSCO. These results (Supplementary Table 4) indicate that a smaller  
114 proportion of BUSCOs are assembled in the individual de novo assemblies, and the  
115 combined assembly does not contain substantially more duplicated BUSCOs than the  
116 individual assemblies. It is possible that polymorphic genes may be assembled into  
117 different isoforms within a single gene. However, we use tximport to summarise expression  
118 values of all isoforms to the gene level, so even if reads from some individuals map to  
119 different isoforms within a gene, this will not affect the expression level of the genes. We  
120 therefore conclude that our combined assembly is best placed to accurately identify  
121 expression levels of the most genes.

122           To identify and remove transcripts potentially representing microorganism  
123 contaminants from the hydroponic media, for each gene the longest transcript was mapped  
124 to the *Silene uniflora* genome (NCBI: ASM1898310v1)<sup>1</sup> using BLAT<sup>9</sup> v35, with the  
125 database translated into six frames to protein and query three frames into protein using the  
126 arguments -q=RNAX -t=DNAX. Genes with a match >200bp and >90% sequence identity  
127 were retained. To avoid discarding genes with homologs in unassembled regions of the *S.*  
128 *uniflora* genome, the translated protein sequences of the transcripts were searched against  
129 the SwissProt/UniProt<sup>10</sup> database [version 290; using BLASTP v2.10.0<sup>11</sup>]. Genes with a  
130 top hit to an Embryophyte with match length >200bp and >70% sequence identity were  
131 also retained. This resulted in the retention of 27,970 genes for use in downstream analysis.

132  
133

134 To identify how many recently duplicated genes may be collapsed into a single  
135 contig in our assembly, we took BLAT matches from our filtered transcriptome that  
136 matched the *S. uniflora* genome with >200bp length and >90% sequence ID. So that locus  
137 to contig relationships could be unambiguously identified, we chose regions that had a  
138 single contig mapped; 940 contigs mapped to these regions. Of these, 86 had a hit on a  
139 different scaffold of which 77 had a match length >95% of the length of the first match;  
140 these contigs could represent expression products of these multiple loci being collapsed.  
141 This suggests that a small proportion of contigs (<10%) may result from gene expression  
142 of multiple loci.

143 Merging multiple genes that have expression differences between conditions may  
144 cause those differences to be dampened or cancel each other out, but would not result in  
145 increased signal. We do not think that contigs consisting of duplicated genes should be  
146 excluded either - changes in gene copy number has been shown as a driver of gene  
147 expression change (e.g., Stranger et al. 2007<sup>12</sup>) including in metal tolerance (e.g., Craciun  
148 et al. 2012<sup>13</sup>). We would also note that genes with highly similar sequences may be hard to  
149 resolve during genome assembly, and unambiguously mapping reads to one vs. another  
150 copy of a gene would be comparably challenging to a reference genome assembly as it  
151 would be to a de novo transcriptome.”

152 To annotate the transcriptome, ORFs >100 amino acids were searched against the  
153 Pfam-A<sup>14</sup> v33.0 database using hmmer<sup>15</sup> v3.3 to identify protein domains. These results  
154 along with the blastp results described above were loaded into an SQLite database using  
155 trinotate<sup>16</sup> v3.2.1.

156



157 **4. Defining genes as having undergone substantial PC and EC**

158 Only genes having “substantial” PC and EC were investigated for their subsequent  
159 response to ancestral plasticity, to avoid spurious classification into these categories for  
160 genes with very small expression shifts. There are a number of possible approaches to  
161 define this. 1. Ghalambor *et al.*<sup>17</sup> and other studies in the field have used a fixed cutoff of  
162  $0.2 \times L_0$  for the magnitude of both EC and PC. However, genes with high expression  
163 variability may have average expression values distorted by a single outlier individual. 2.  
164 Using a cutoff of  $0.2 \times L_0$  for the magnitude of EC and PC, and additionally statistically  
165 significant expression shifts for both S1 and S2 between conditions (PC) and S1 and T1,  
166 and S2 and T2, in the zinc (EC). This approach results in a much larger proportion of genes  
167 being discarded (Supplementary Table 3). Too stringent an approach may risk distorting  
168 the results; overshooting in particular is characterised by a relatively small expression shift  
169 in EC compared to PC. Expression shifts in adaptive genes (Fig. 3B, 3C) are relatively  
170 small and may be particularly sensitive to such an approach. 3. Defining substantial PC as  
171 a significant expression shift in both S1 and S2, combining data across both populations  
172 (using a model  $\sim \text{Ecotype} + \text{Ecotype:Individual\_plant} + \text{Ecotype:Condition}$ ), and defining  
173 EC as a significant expression shift from susceptible to tolerant individuals in the zinc  
174 (using a model with a single combined term for Ecotype and Condition). This approach  
175 increases the power to detect small shifts in expression by combining replicates whilst  
176 avoiding the problem of highly variable genes distorting the mean. Whilst this approach  
177 may be problematic for genes with different behaviours between geographic pairs, the CEC  
178 and DP gene sets were defined as those showing highly similar behaviours across both  
179 populations pairs. The third method was used in the main text; all three approaches are

180 compared in Supplementary Table 3. The second method gives a relatively high  
181 proportions of genes undergoing reinforcement and overshooting; whereas the third gives  
182 many more genes undergoing reversion in all comparisons, with the first method giving an  
183 intermediate number of reinforcements and overshooting. All three methods show a  
184 substantial enrichment in genes undergoing reversion in CEC genes, and a smaller  
185 enrichment of genes undergoing overshooting in DP genes.

186

#### 187 **5. Parametric bootstrapping for classifying responses to ancestral plasticity**

188 Parametric bootstrapping was implemented in R following the method of Ho & Zhang<sup>18</sup>;  
189 for each gene normal distributions were generated with means  $L_o$ ,  $L_p$  and  $L_a$  and sd the  
190 standard error of  $L_o$ ,  $L_p$  and  $L_a$  as estimated from the data (i.e. from across the 6 individuals  
191 used to generate each parameter). Values were randomly drawn from each distribution and  
192 from these the gene was classified as reversal, overshooting or reinforcement. This was  
193 repeated 100 times per gene and genes which did not show one classification in 95 or more  
194 repeats were excluded from the analysis. The results of this analysis for the entire  
195 transcriptome, CEC and DP genes are shown in Supplementary Table 1.

196

#### 197 **4. Genotyping and phylogenetic inference**

198 For genotyping, cleaned reads from each individual were mapped to the longest isoforms  
199 of each Trinity gene using HISAT2<sup>19</sup> v2.2.1, with reads with MAPQ <20 removed using  
200 samtools<sup>20</sup> v1.7. Genotypes were called using bcftools v1.10.2<sup>21</sup>. Indels were removed, and  
201 at least 2 genotyped individuals per population were required for a site to be included, with  
202 a minimum read depth of 6 for a sample to be genotyped. Per-population vcfs were merged

203 and sites with QUAL<20 removed. Only sites in the filtered genes used in the gene  
204 expression analysis were included. A phylogenetic tree was constructed using SNPhylo<sup>22</sup>  
205 v20180901 using default settings, which removes sites with linkage disequilibrium >0.1,  
206 missing rate >0.1 and minor allele frequency <0.1, and constructs a maximum-likelihood  
207 tree. This resulted in a tree generated from 15,285 SNPs, with 100 non-parametric bootstrap  
208 replicates performed to assess branch support. All inter-population branches had bootstrap  
209 support  $\geq 99\%$ . (Figure 1A).

210

## 211 **5. Models and contrasts used for differential gene expression**

212 To identify sets of differentially expressed genes, models were fit to the entire dataset in  
213 DESeq2 using the `~design()` function. Contrasts were then used to identify sets of  
214 differentially expressed genes within subsets of the dataset using the `results()` function.  
215 Sections 5.1-5.4 show levels of each factor assigned to each individual, how these were  
216 combined into a model, and the subsequent contrasts used to define sets of differentially  
217 expressed genes. Subsets, unions or intersections of these genes form the CEC, DP and  
218 other sets of genes described in the main text.

219 To identify genes differentially expressed between populations within each condition,  
220 a model with a single factor representing all the combinations of population and condition  
221 was fitted (Pop\_Cond) and the relevant contrasts identified as recommended in the  
222 Interactions section of the DESeq2 user guide (Section 5.1 below). For between-conditions  
223 comparisons, the paired pools of clones between conditions (i.e. individual i1 of population  
224 S1 was present in both C and Z) allowed us to fit a model that accounted for differences  
225 due to individual genotypes (Section 5.2) below, as specified in the “group-specific  
226 condition effects, individuals nested within groups” section of the DESeq2 user guide.

227 Analogous models were fit, using an ecotype term (S vs. T) rather than population (S1, S2,  
 228 T1, T2) to identify genes with substantial |PC| and |EC| (see Section 4 above for  
 229 justification; Sections 5.3 and 5.4 below for models and contrasts used). The impact of not  
 230 including a genotype specific term was assessed by identifying between-condition changes  
 231 using contrasts from the ~Pop\_Cond and ~Eco\_Cond models, using the contrasts T1C vs.  
 232 T1Z, T2C vs. T2Z, S1C vs. S1Z, S2C vs. S2Z at the population level and TC vs. TZ, SC vs.  
 233 SZ at the ecotype level respectively, which do not include the effect of genotype. The  
 234 results of this are displayed in Supplementary Table 5; fewer genes with between-condition  
 235 changes are identified, but this has minimal impact on our estimates of evolutionary  
 236 responses to ancestral plasticity across different gene sets.

237

238 **5.1 Within-condition comparisons (population level):**

239 Individual assignments:

240

| Sample  | Pop Cond |
|---------|----------|
| T1 i1 C | T1C      |
| T1 i1 Z | T1Z      |
| T1 i2 C | T1C      |
| T1 i2 Z | T1Z      |
| T1 i3 C | T1C      |
| T1 i3 Z | T1Z      |
| S1 i1 C | S1C      |
| S1 i1 Z | S1Z      |
| S1 i2 C | S1C      |
| S1 i2 Z | S1Z      |
| S1 i3 C | S1C      |
| S1 i3 Z | S1Z      |
| T2 i1 C | T2C      |
| T2 i1 Z | T2Z      |
| T2 i2 C | T2C      |
| T2 i2 Z | T2Z      |
| T2 i3 C | T2C      |
| T2 i3 Z | T2Z      |
| S2 i1 C | S2C      |

|         |     |
|---------|-----|
| S2 i1 Z | S2Z |
| S2 i2 C | S2C |
| S2 i2 Z | S2Z |
| S2 i3 C | S2C |
| S2 i3 Z | S2Z |

241  
242  
243  
244  
245  
246  
247

Design matrix:

~Pop\_Cond

Contrasts:

| Contrast    | Genes                | Gene set                 |
|-------------|----------------------|--------------------------|
| S1C vs. S2C | S1 vs. S2 in control | a (Extended Data Fig. 3) |
| S1C vs. T1C | S1 vs. T1 in control | b (Extended Data Fig. 3) |
| S2C vs. T2C | S2 vs. T2 in control | c (Extended Data Fig. 3) |
| T1C vs. T2C | T1 vs. T2 in control | d (Extended Data Fig. 3) |
| S1Z vs. S2Z | S1 vs. S2 in zinc    | i (Extended Data Fig. 3) |
| S1Z vs. T1Z | S1 vs. T1 in zinc    | j (Extended Data Fig. 3) |
| S2Z vs. T2Z | S2 vs. T2 in zinc    | k (Extended Data Fig. 3) |
| T1Z vs. T2Z | T1 vs. T2 in zinc    | l (Extended Data Fig. 3) |

248  
249  
250

## 251 5.2 Between-condition comparisons (population level)

252  
253  
254

Individual assignments:

| Sample  | Pop | Cond | Ind |
|---------|-----|------|-----|
| T1 i1 C | T1  | C    | 1   |
| T1 i1 Z | T1  | Z    | 1   |
| T1 i2 C | T1  | C    | 2   |
| T1 i2 Z | T1  | Z    | 2   |
| T1 i3 C | T1  | C    | 3   |
| T1 i3 Z | T1  | Z    | 3   |
| S1 i1 C | S1  | C    | 1   |
| S1 i1 Z | S1  | Z    | 1   |
| S1 i2 C | S1  | C    | 2   |
| S1 i2 Z | S1  | Z    | 2   |
| S1 i3 C | S1  | C    | 3   |
| S1 i3 Z | S1  | Z    | 3   |
| T2 i1 C | T2  | C    | 1   |
| T2 i1 Z | T2  | Z    | 1   |
| T2 i2 C | T2  | C    | 2   |

|         |    |   |   |
|---------|----|---|---|
| T2 i2 Z | T2 | Z | 2 |
| T2 i3 C | T2 | C | 3 |
| T2 i3 Z | T2 | Z | 3 |
| S2 i1 C | S2 | C | 1 |
| S2 i1 Z | S2 | Z | 1 |
| S2 i2 C | S2 | C | 2 |
| S2 i2 Z | S2 | Z | 2 |
| S2 i3 C | S2 | C | 3 |
| S2 i3 Z | S2 | Z | 3 |

255

256 Design matrix:

257

258 ~Pop + Pop:Ind + Pop:Cond

259

260 Contrasts:

261

| Contrast    | Genes                        | Gene set                 |
|-------------|------------------------------|--------------------------|
| PopT1.CondZ | T1 in control vs. T1 in zinc | g (Extended Data Fig. 3) |
| PopS1.CondZ | S1 in control vs. S1 in zinc | e (Extended Data Fig. 3) |
| PopT2.CondZ | T2 in control vs. T2 in zinc | h (Extended Data Fig. 3) |
| PopS2.CondZ | S2 in control vs. S2 in zinc | f (Extended Data Fig. 3) |

262

263 **5.3 Within-condition comparisons (ecotype level):**

264 Individual assignments:

265

| Sample  | Eco_Cond |
|---------|----------|
| T1 i1 C | TC       |
| T1 i1 Z | TZ       |
| T1 i2 C | TC       |
| T1 i2 Z | TZ       |
| T1 i3 C | TC       |
| T1 i3 Z | TZ       |
| S1 i1 C | SC       |
| S1 i1 Z | SZ       |
| S1 i2 C | SC       |
| S1 i2 Z | SZ       |
| S1 i3 C | SC       |
| S1 i3 Z | SZ       |
| T2 i1 C | TC       |
| T2 i1 Z | TZ       |
| T2 i2 C | TC       |

|         |    |
|---------|----|
| T2 i2 Z | TZ |
| T2 i3 C | TC |
| T2 i3 Z | TZ |
| S2 i1 C | SC |
| S2 i1 Z | SZ |
| S2 i2 C | SC |
| S2 i2 Z | SZ |
| S2 i3 C | SC |
| S2 i3 Z | SZ |

266

267 Design matrix:

268

269 ~Eco\_Cond

270

271 Contrasts:

272

| Contrast | Genes           | Gene Set        |
|----------|-----------------|-----------------|
| SZ vs.TZ | S vs. T in zinc | Substantial  EC |

273

#### 274 **5.4 Between-condition comparisons (ecotype level)**

275 Individual assignments:

276

| Sample  | Ecotype | Cond | Ind |
|---------|---------|------|-----|
| T1 i1 C | T       | C    | 1   |
| T1 i1 Z | T       | Z    | 1   |
| T1 i2 C | T       | C    | 2   |
| T1 i2 Z | T       | Z    | 2   |
| T1 i3 C | T       | C    | 3   |
| T1 i3 Z | T       | Z    | 3   |
| S1 i1 C | S       | C    | 1   |
| S1 i1 Z | S       | Z    | 1   |
| S1 i2 C | S       | C    | 2   |
| S1 i2 Z | S       | Z    | 2   |
| S1 i3 C | S       | C    | 3   |
| S1 i3 Z | S       | Z    | 3   |
| T2 i1 C | T       | C    | 4   |
| T2 i1 Z | T       | Z    | 4   |
| T2 i2 C | T       | C    | 5   |
| T2 i2 Z | T       | Z    | 5   |
| T2 i3 C | T       | C    | 6   |
| T2 i3 Z | T       | Z    | 6   |
| S2 i1 C | S       | C    | 4   |
| S2 i1 Z | S       | Z    | 4   |

|         |   |   |   |
|---------|---|---|---|
| S2 i2 C | S | C | 5 |
| S2 i2 Z | S | Z | 5 |
| S2 i3 C | S | C | 6 |
| S2 i3 Z | S | Z | 6 |

277

278 Design matrix:

279

280 ~Ecotype + Ecotype:Ind + Ecotype:Cond

281

282 Contrasts:

283

| Contrast       | Genes                                    | Gene set        |
|----------------|------------------------------------------|-----------------|
| EcotypeS.CondZ | Susceptible individuals control vs. zinc | Substantial  PC |

284

285

286

287 **Supplementary File 1 (File\_S1.csv): Overrepresented Gene Ontology (GO) terms for**

288 **genes upregulated in the zinc in S1 and S2.**

289 For genes upregulated from control to zinc in both S1 and S2 in the same direction, table

290 outlining enriched GO terms. Each row indicates a GO ID with columns indicating: i) the

291 GO\_ID; ii) overrepresented p-value; iii) underrepresented p-value; iv) the number of genes

292 in the background set; v) the number of genes in the query set; vi) the GO term; vii) the

293 GO ontology; viii) the over-represented false discovery rate; and ix) the GO term.

294

295 **Supplementary File 2 (File\_S2.csv): Overrepresented Gene Ontology (GO) terms for**

296 **genes differentially expressed between S1 and T1, and S2 and T2, in the zinc**

297 **treatment.**

298 For genes differentially expressed between T1 and S1, and T2 and S2, in the zinc treatment,

299 in the same direction, table outlining enriched GO terms. Each row indicates a GO ID with

300 columns indicating: i) the GO\_ID; ii) overrepresented p-value; iii) underrepresented p-



301 value; iv) the number of genes in the background set; v) the number of genes in the query  
302 set; vi) the GO term; vii) the GO ontology; viii) the overrepresented false discovery rate;  
303 and ix) the GO term.

304

305 **Supplementary File 3 (File\_S3.csv): Overrepresented Gene Ontology (GO) terms for**  
306 **derived plasticity (DP) genes with ancestral plasticity.** For genes displaying the DP  
307 expression pattern (see main text for definition), which also showed differential expression  
308 between treatments in S1 and S2, table outlining enriched GO terms. Each row indicates a  
309 GO ID with columns indicating: i) the GO\_ID; ii) overrepresented p-value; iii)  
310 underrepresented p-value; iv) the number of genes in the background set; v) the number of  
311 genes in the query set; vi) the GO term; vii) the GO ontology; viii) the overrepresented  
312 false discovery rate; and ix) the GO term.

313

314 **Supplementary File 4 (File\_S4.csv): Overrepresented Gene Ontology (GO) terms for**  
315 **derived plasticity (DP) genes without ancestral plasticity.** For genes displaying the DP  
316 expression pattern (see main text for definition), but which did not show differential  
317 expression between treatments in S1 and S2, table outlining enriched GO terms. Each row  
318 indicates a GO ID with columns indicating: i) the GO\_ID; ii) overrepresented p-value; iii)  
319 underrepresented p-value; iv) the number of genes in the background set; v) the number of  
320 genes in the query set; vi) the GO term; vii) the GO ontology; viii) the overrepresented  
321 false discovery rate; and ix) the GO term.

322

323 **Supplementary File 5 (File\_S5.csv): Overrepresented Gene Ontology (GO) terms for**  
324 **constitutive expression change (CEC) genes.** For genes displaying the CEC expression  
325 pattern (see main text for definition), table outlining enriched GO terms. Each row indicates  
326 a GO ID with columns indicating: i) the GO\_ID; ii) overrepresented p-value; iii)  
327 underrepresented p-value; iv) the number of genes in the background set; v) the number of  
328 genes in the query set; vi) the GO term; vii) the GO ontology; viii) the overrepresented  
329 false discovery rate; and ix) the GO term.

330

331 **Supplementary File 6 (File\_S6.csv): Overrepresented Gene Ontology (GO) terms for**  
332 **derived plasticity (DP) genes.** For genes displaying the DP expression pattern (see main  
333 text for definition), table outlining enriched GO terms. Each row indicates a GO ID with  
334 columns indicating: i) the GO\_ID; ii) overrepresented p-value; iii) underrepresented p-  
335 value; iv) the number of genes in the background set; v) the number of genes in the query  
336 set; vi) the GO term; vii) the GO ontology; viii) the overrepresented false discovery rate;  
337 and ix) the GO term.

338

339 **Supplementary File 7 (File\_S7.csv): Data for individual RNA samples.** For each  
340 individual sequenced, table outlining i) the sample ID, ii) the date of extraction, iii) the  
341 Plant ID, iv) the population ID, v) RNA concentration measured on a Nanodrop 3000, vi)  
342 the 260/280nm absorbance ratio, vii) the 260/230 absorbance ratio, viii) RNA  
343 concentration measured on a Qubit, ix) the elution volume (first + second elution), x) the  
344 extraction batch, xi) the RNA integrity number (RIN), xii) the number of raw reads, xiii)

345 the number of clean reads produced per sample, and xiv) whether that sample was used in  
346 *de novo* transcriptome construction.

347

348 **Supplementary File 8 (File\_S8.phylip.txt):** Phylip format file of sites used to construct  
349 the phylogenetic tree in Figure 1A.

350

351

352 **Supplementary Table 1: Impact of parametric bootstrapping on response to ancestral**

353 **plasticity classification.**

354

355 Classifications of genes showing substantial ancestral plasticity and evolutionary change

356 from i) the entire transcriptome, ii) genes showing derived plasticity (DP genes), iii) genes

357 showing constitutive expression changes (CEC) by their evolutionary response to ancestral

358 plasticity; reversion, overshooting or reinforcement. Listed either without parametric

359 bootstrapping or after parametric bootstrapping (the % of genes followed by the number

360 able to be classified).

361

362

| <b>Gene set</b>      | <b>Class</b>  | <b>No bootstrapping</b> | <b>Bootstrapping</b> |
|----------------------|---------------|-------------------------|----------------------|
| Entire transcriptome | Reversion     | 95.2% (12,070)          | 98.5% (8,952)        |
|                      | Overshooting  | 3.7% (465)              | 0.7% (67)            |
|                      | Reinforcement | 1.1% (144)              | 0.8% (72)            |
| DP Genes             | Reversion     | 79.6% (90)              | 91.5% (86)           |
|                      | Overshooting  | 16.8% (19)              | 5.3% (5)             |
|                      | Reinforcement | 3.5% (4)                | 3.2% (3)             |
| CEC Genes            | Reversion     | 68.4% (154)             | 74.9% (128)          |
|                      | Overshooting  | 3.6% (8)                | 1.8% (3)             |
|                      | Reinforcement | 28.0% (63)              | 23.4% (40)           |

363

364

365

366

367

368

369

370

371

372 **Supplementary Table 2: Classification of evolutionary response to ancestral plasticity**

373 **in geographic pairs.**

374 Table outlining for genes in i) the entire transcriptome, ii) DP genes, iii) genes with derived  
 375 plasticity in only one of T1 or T2, iii) CEC genes, iv) CEC genes and v) genes with  
 376 constitutive expression changes in only one of T1 or T2, evolutionary responses to  
 377 ancestral plasticity. For each gene set, the percentage of genes that could be classified (that  
 378 showed substantial ancestral plasticity and evolutionary change; see Methods) and the  
 379 proportions assigned to overshooting, reversions and reinforcement are given. The values  
 380 are either calculated based on values of  $L_o$ ,  $L_p$  and  $L_a$  calculated from a) T1 and S1 only  
 381 (i.e.  $L_p$  is average of S1 expression in zinc;  $L_a$  is expression of T1 in the zinc etc.), b) T2  
 382 and S2 only (i.e.  $L_p$  is average of S2 expression in zinc;  $L_a$  is expression of T2 in the zinc  
 383 etc.) and c) the combined values (i.e.  $L_p$  is average of S1 and S2 expression in zinc;  $L_a$  is  
 384 expression of T1 and T2 in the zinc etc.; see Methods); note that these are the values used  
 385 in the text unless otherwise stated.

386

387

|                                                                       | <b>T1/S1</b> | <b>T2/S2</b> | <b>Combined</b> |
|-----------------------------------------------------------------------|--------------|--------------|-----------------|
| % of whole transcriptome classified                                   | 36.1%        | 37.1%        | 45.3%           |
| Whole transcriptome classifications:                                  |              |              |                 |
| Overshooting                                                          | 12.3%        | 7.7%         | 3.7%            |
| Reversion                                                             | 83.8%        | 87.3%        | 95.2%           |
| Reinforcement                                                         | 3.9%         | 5.1%         | 1.1%            |
| % of DP genes classified                                              | 81.0%        | 81.0%        | 82.5%           |
| DP gene classifications:                                              |              |              |                 |
| Overshooting                                                          | 12.6%        | 16.2%        | 16.8%           |
| Reversion                                                             | 82.8%        | 81.1%        | 79.6%           |
| Reinforcement                                                         | 4.5%         | 2.7%         | 3.5%            |
| % of genes with derived plasticity in only one of T1 or T2 classified | 73.1%        | 71.8%        | NA              |

|                                                                                    |       |       |       |
|------------------------------------------------------------------------------------|-------|-------|-------|
| Genes with derived plasticity in only one of T1 or T2 classifications              |       |       |       |
| Overshooting                                                                       | 15.8% | 11.1% | NA    |
| Reversion                                                                          | 76.3% | 84.2% | NA    |
| Reinforcement                                                                      | 7.9%  | 4.6%  | NA    |
| % of CEC genes classified                                                          | 44.0% | 42.0% | 56.2% |
| CEC gene classifications:                                                          |       |       |       |
| Overshooting                                                                       | 5.11% | 3.6%  | 3.6%% |
| Reversion                                                                          | 74.4% | 79.2% | 68.4% |
| Reinforcement                                                                      | 20.5% | 17.3% | 28.0% |
| % of genes with constitutive expression changes in only one of T1 or T2 classified | 37.5% | 35.3% | NA    |
| Genes with constitutive expression changes in only one of T1 or T2 classifications |       |       |       |
| Overshooting                                                                       | 13.5% | 11.2% | NA    |
| Reversion                                                                          | 74.9% | 80.5% | NA    |
| Reinforcement                                                                      | 11.6% | 8.3%  | NA    |

388

389

390

391 **Supplementary Table 3: Evolutionary responses to ancestral plasticity using different**

392 **criteria for defining “substantial” ancestral plasticity (PC) and evolutionary change**

393 **(EC).** Table outlining evolutionary responses to ancestral plasticity (metrics outlined in

394 table rows), using genes with “substantial” EC and PC defined using each of the three

395 methods outlined in the Supplementary Methods. i) a significance threshold for gene

396 expression changes in susceptible populations between conditions (PC) and between

397 susceptible and tolerant populations in zinc (EC), ii) the magnitude of PC and EC being

398 greater than 20% of the average expression level of the gene in ancestral populations in

399 control conditions ( $L_0$ ), iii) significant differential expression between conditions in both

400 S1 and S2, and between S1 and T1 and S2 and T2 in the zinc, in addition to the criteria

401 outlined in (ii). Method (i) is used in the main text.

| <b>Result</b>                                                               | <b>Significance threshold for EC and PC (main text; See Methods)</b> | <b> EC  and  PC  &gt; 0.2*Lo</b>                              | <b> EC  and  PC  &gt; 0.2*Lo, differentially expressed in both susceptible populations between treatments, differentially expressed between both tolerant and sensitive populations in zinc.</b> |
|-----------------------------------------------------------------------------|----------------------------------------------------------------------|---------------------------------------------------------------|--------------------------------------------------------------------------------------------------------------------------------------------------------------------------------------------------|
| Proportion of whole transcriptome passing “substantial EC and PC” threshold | 45.3%                                                                | 75.6%                                                         | 29.3%                                                                                                                                                                                            |
| Whole transcriptome response to ancestral plasticity                        | Reversion=95.2%,<br>Overshooting=3.7%,<br>Reinforcement=1.1%         | Reversion=84.8%,<br>Overshooting=9.5%,<br>Reinforcement=5.7%  | Reversion=96.9%,<br>Overshooting=2.5%,<br>Reinforcement=0.6%                                                                                                                                     |
| Proportion of DP genes passing “substantial EC and PC threshold”            | 82.5%                                                                | 86.9%                                                         | 76.7%                                                                                                                                                                                            |
| DP gene response to ancestral plasticity                                    | Reversion=79.6%,<br>Overshooting=16.8%,<br>Reinforcement=3.5%        | Reversion=79.8%,<br>Overshooting=12.6%,<br>Reinforcement=7.6% | Reversion=81.9%,<br>Overshooting=14.3%,<br>Reinforcement=3.8%                                                                                                                                    |
| Proportion of CEC genes passing “substantial EC and PC threshold”           | 56.2%                                                                | 74.5%                                                         | 38.0%                                                                                                                                                                                            |
| CEC gene response to ancestral plasticity                                   | Reversion=68.4%,<br>Overshooting=3.6%,<br>Reinforcement=28.0%        | Reversion=63.8%,<br>Overshooting=3.0%,<br>Reinforcement=33.2% | Reversion=85.5%,<br>Overshooting=0.7%,<br>Reinforcement=13.8%                                                                                                                                    |
| p-value for CEC genes showing more                                          | i = $<2.2 \times 10^{-16}$<br>ii = $<2.2 \times 10^{-16}$            | i = $<2.2 \times 10^{-16}$<br>ii = $<2.2 \times 10^{-16}$     | i = $3.9 \times 10^{-7}$<br>ii = $2.2 \times 10^{-16}$                                                                                                                                           |

|                                                                                                                                                                       |                                        |                                        |                                        |
|-----------------------------------------------------------------------------------------------------------------------------------------------------------------------|----------------------------------------|----------------------------------------|----------------------------------------|
| reinforcement than i) DP genes and ii) whole transcriptome                                                                                                            |                                        |                                        |                                        |
| Proportion of genes with CEC expression pattern in only i) T1 or ii) T2 showing reversion.                                                                            | i = 74.9%<br>ii = 80.5%                | i = 77.2%<br>ii = 82.8%                | i = 77.2%<br>ii = 82.8%                |
| Proportion of genes with DP expression pattern in only i) T1 or ii) T2 showing reversion                                                                              | i = 76.3%<br>ii = 84.2%                | i = 80.5%<br>ii = 86.1%                | i = 80.5%<br>ii = 86.1%                |
| p-value for genes showing ancestral plasticity vs. no ancestral plasticity having different  FC  similarity in T1 vs. T2 in the zinc in i) DP genes and ii) CEC genes | i = 0.18<br>ii = 0.86                  | i = 0.98<br>ii = 0.88                  | i = 0.82<br>ii = 0.64                  |
| Percent of originally classified genes classified after permutation for i) Whole transcriptome,                                                                       | i = 71.7%<br>ii = 83.2%<br>iii = 76.0% | i = 46.4%<br>ii = 77.3%<br>iii = 55.0% | i = 82.8%<br>ii = 84.8%<br>iii = 85.5% |



|                                                                                        |                                                               |                                                                       |                                                              |
|----------------------------------------------------------------------------------------|---------------------------------------------------------------|-----------------------------------------------------------------------|--------------------------------------------------------------|
| ii) DP genes<br>and iii) CEC<br>genes                                                  |                                                               |                                                                       |                                                              |
| Whole<br>transcriptome<br>response to<br>ancestral<br>plasticity after<br>permutations | Reversion=98.5%,<br>Overshooting=0.7%,<br>Reinforcement=0.8%  | Reversion = 98.9%,<br>Overshooting = 0.4%<br>Reinforcement = 0.8%     | Reversion=99.6%,<br>Overshooting=0.3%,<br>Reinforcement=0.2% |
| DP gene<br>response to<br>ancestral<br>plasticity after<br>permutations                | Reversion=91.5%,<br>Overshooting=5.3%,<br>Reinforcement=3.2%  | Reversion = 93.5%,<br>Overshooting = 4.3%,<br>Reinforcement = 2.1%    | Reversion=94.4%,<br>Overshooting=4.4%,<br>Reinforcement=1.1% |
| CEC gene<br>response to<br>ancestral<br>plasticity after<br>permutations               | Reversion=74.9%,<br>Overshooting=1.7%,<br>Reinforcement=23.4% | Reversion = 81.1%,<br>Overshooting = 0.6%,<br>Reinforcement<br>=18.3% | Reversion=91.3%,<br>Overshooting=0.8%,<br>Reinforcement=7.9% |

402

403

404

405 **Supplementary Table 4: BUSCO assembly scores for individual and combined**  
406 **transcriptome assemblies.** The proportion of BUSCO single copy genes in the from the  
407 Eudicot dataset present as i) single copy, ii) duplicated, iii) fragmented and iv) missing in  
408 de novo assemblies of 4 individuals (1 per population, outlined in brackets), plus the  
409 combined de novo assembly using all the data from these 4 individuals.

|             | <b>BD1 (S1)</b> | <b>SA6 (S2)</b> | <b>GR10 (T1)</b> | <b>PP1 (T2)</b> | <b>Combined</b> |
|-------------|-----------------|-----------------|------------------|-----------------|-----------------|
| Single copy | 66.2%           | 68.4%           | 71.3%            | 69.4%           | 72.8%           |
| Duplicated  | 2.1%            | 2.4%            | 2.7%             | 2.3%            | 2.7%            |
| Fragmented  | 8.5%            | 8.1%            | 7.1%             | 8.5%            | 8.3%            |
| Missing     | 23.2%           | 21.1%           | 18.9%            | 19.8%           | 16.2%           |

410

411 **Supplementary Table 5: Evolutionary responses to ancestral plasticity, controlling or**  
412 **not controlling for an effect of the genotypes of paired clones between treatments.**

413 Comparison of the method of identifying differentially expressed genes between  
414 conditions; i) where effects of genotypes of the paired clones between treatments are  
415 controlled for by employing a model of  $\sim$ Pop + Pop:Ind + Pop:Cond (with contrasts  
416 PopS1.CondZ, PopS2.CondZ etc.) and  $\sim$ Ecotype + Ecotype:Ind + Ecotype:Cond (with  
417 contrast EcotypeS.CondZ), as in the main text, or ii) where no effect of genotype is  
418 included, by using the models  $\sim$ Pop\_Cond (using contrasts S1C vs. S1Z, T1C vs. T1Z etc. )  
419 and  $\sim$ Eco\_Cond (using contrasts SC vs. SZ). For each of these methods, for the i) Entire  
420 transcriptome, ii) DP genes and ii) CEC genes, the total number of genes and those  
421 classified as undergoing reversion (REV), overshooting (OVER) or reinforcement (RI) are

422 displayed; as a percentage of the total number of genes showing substantial |EC| and |PC|,  
 423 with the raw number of genes in brackets.

| Gene set             | Metric          | Controlling for genotype (main text) | Not controlling for genotype |
|----------------------|-----------------|--------------------------------------|------------------------------|
| Entire transcriptome | REV             | 95.2% (12,070)                       | 95.5% (11,169)               |
|                      | OVER            | 3.7% (465)                           | 4.0% (466)                   |
|                      | RI              | 1.1% (144)                           | 0.6% (65)                    |
| DP Genes             | Number of genes | 137                                  | 46                           |
|                      | REV             | 79.6% (90)                           | 71.1% (27)                   |
|                      | OVER            | 16.8% (19)                           | 23.7% (9)                    |
|                      | RI              | 3.5% (4)                             | 5.3% (2)                     |
| CEC Genes            | Number of genes | 400                                  | 400                          |
|                      | REV             | 68.4% (154)                          | 73.9% (125)                  |
|                      | OVER            | 3.6% (8)                             | 4.7% (8)                     |
|                      | RI              | 28.0% (63)                           | 21.3% (36)                   |

424

425 **SI References**

- 426 1. Papadopoulos, A. S. T. *et al.* Rapid parallel adaptation to anthropogenic heavy  
 427 metal Pollution. *Molecular Biology and Evolution* 38, 3724–3736 (2021).  
 428 2. Andrews, S. A. FATSQC, a quality control tool for high throughput sequence  
 429 data. 2010. (2015).  
 430 3. Patel, R. K. & Jain, M. NGS QC Toolkit: A toolkit for quality control of next  
 431 generation sequencing data. *PLoS ONE* 7, e30619 (2012).  
 432 4. Bolger, A. M., Lohse, M. & Usadel, B. Trimmomatic: a flexible trimmer for  
 433 illumina sequence data. *Bioinformatics* 30, 2114–2120 (2014).

- 434 5. Haas, B. J. *et al.* De novo transcript sequence reconstruction from RNA-seq using  
435 the Trinity platform for reference generation and analysis. *Nature Protocols* 8, 1494–  
436 1512 (2013).
- 437 6. Bray, N. L., Pimentel, H., Melsted, P. & Pachter, L. Near-optimal probabilistic  
438 RNA-seq quantification. *Nature Biotechnology* 34, 525–527 (2016).
- 439 7. Williams, A. M., Itgen, M. W., Broz, A. K., Carter, O. G. & Sloan, D. B. Long-  
440 read transcriptome and other genomic resources for the angiosperm *Silene noctiflora*. *G3:  
441 Genes, Genomes, Genetics* 11, (2021).
- 442 8. Seppey, M., Manni, M. & Zdobnov, E. M. BUSCO: Assessing genome assembly  
443 and annotation completeness. in *Methods in Molecular Biology* vol. 1962 227–245  
444 (Humana Press Inc., 2019).
- 445 9. Kent, W. J. BLAT---The BLAST-Like Alignment Tool. *Genome Research* 12,  
446 656–664 (2002).
- 447 10. Bateman, A. UniProt: A worldwide hub of protein knowledge. *Nucleic Acids  
448 Research* 47, D506–D515 (2019).
- 449 11. Altschul, S. F., Gish, W., Miller, W., Myers, E. W. & Lipman, D. J. Basic local  
450 alignment search tool. *Journal of Molecular Biology* 215, 403–410 (1990).
- 451 12. Stranger, B. E. *et al.* Relative impact of nucleotide and copy number variation on  
452 gene expression phenotypes. *Science* 315, 848–853 (2007).
- 453 13. Craciun, A. R. *et al.* Variation in HMA4 gene copy number and expression  
454 among *Noccaea caerulescens* populations presenting different levels of Cd tolerance and  
455 accumulation. *Journal of Experimental Botany* 63, 4179–4189 (2012).
- 456 14. Finn, R. D. *et al.* Pfam: The protein families database. *Nucleic Acids Research*  
457 vol. 42 D222 (2014).
- 458 15. Mistry, J., Finn, R. D., Eddy, S. R., Bateman, A. & Punta, M. Challenges in  
459 homology search: HMMER3 and convergent evolution of coiled-coil regions. *Nucleic  
460 Acids Research* 41, e121–e121 (2013).
- 461 16. Bryant, D. M. *et al.* A tissue-mapped axolotl *de novo* transcriptome enables  
462 identification of limb regeneration factors. *Cell Reports* 18, 762–776 (2017).
- 463 17. Ghalambor, C. K. *et al.* Non-adaptive plasticity potentiates rapid adaptive  
464 evolution of gene expression in nature. *Nature* 525, 372–375 (2015).
- 465 18. Ho, W. C. & Zhang, J. Genetic gene expression changes during environmental  
466 adaptations tend to reverse plastic changes even after the correction for statistical  
467 nonindependence. *Molecular Biology and Evolution* 36, 604–612 (2019).
- 468 19. Kim, D., Paggi, J. M., Park, C., Bennett, C. & Salzberg, S. L. Graph-based  
469 genome alignment and genotyping with HISAT2 and HISAT-genotype. *Nature  
470 Biotechnology* 37, 907–915 (2019).
- 471 20. Li, H. *et al.* The Sequence Alignment/Map format and SAMtools. *Bioinformatics*  
472 25, 2078–2079 (2009).
- 473 21. Li, H. A statistical framework for SNP calling, mutation discovery, association  
474 mapping and population genetical parameter estimation from sequencing data.  
475 *Bioinformatics* 27, 2987–2993 (2011).
- 476 22. Lee, T. H., Guo, H., Wang, X., Kim, C. & Paterson, A. H. SNPhylo: A pipeline to  
477 construct a phylogenetic tree from huge SNP data. *BMC Genomics* 15, 162 (2014).
- 478
- 479
